# Supplementary material for: Synthesis and Evaluation of New Quinoxaline Derivatives of Dehydroabietic Acid as Potential Antitumor Agents
Source: PubMed Central journal article supplement (PMC6152277; doi:10.3390/molecules22071154), 2017-07-11
Supplement: molecules-22-01154-s001.pdf [file molecules-22-01154-s001.pdf]

## Supplementary Materials

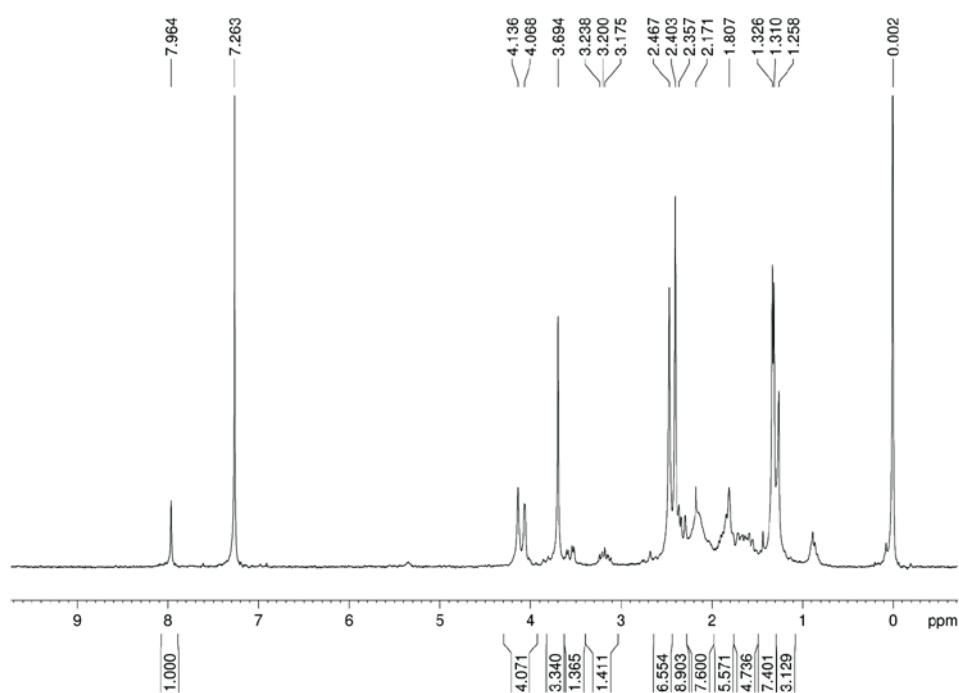

**Figure S1.**  $^1\text{H}$ -NMR spectrum of compound **4a** (300 MHz,  $\text{CDCl}_3$ )

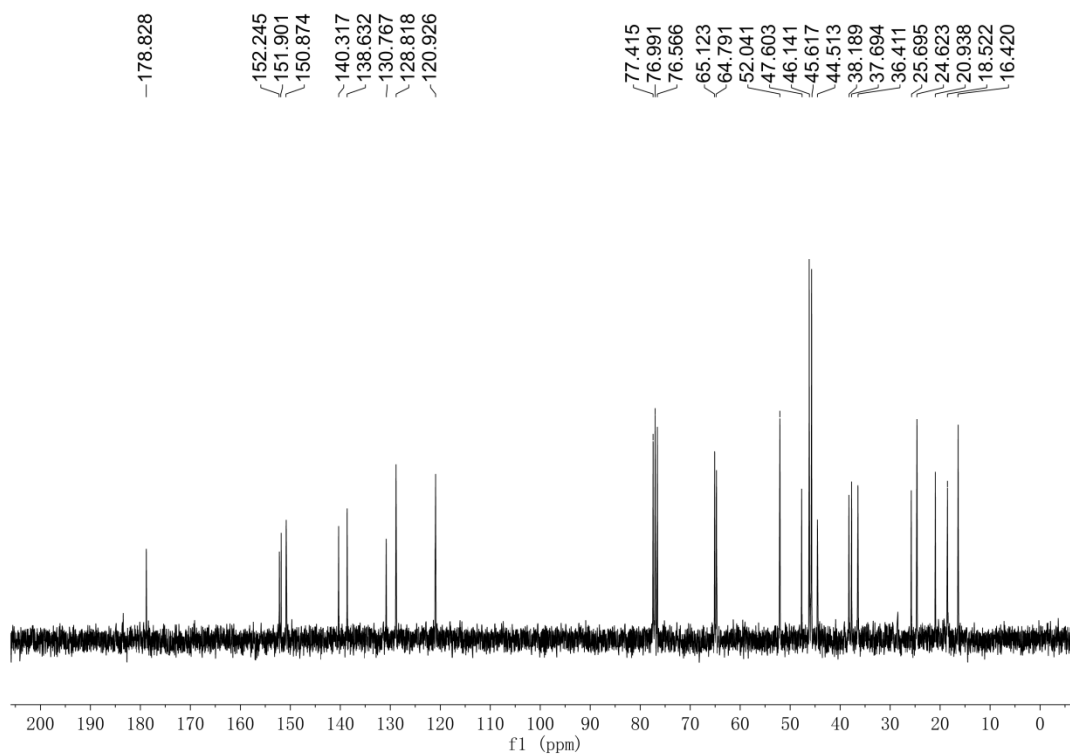

**Figure S1.**  $^{13}\text{C}$ -NMR spectrum of compound **4a** (75 MHz,  $\text{CDCl}_3$ )

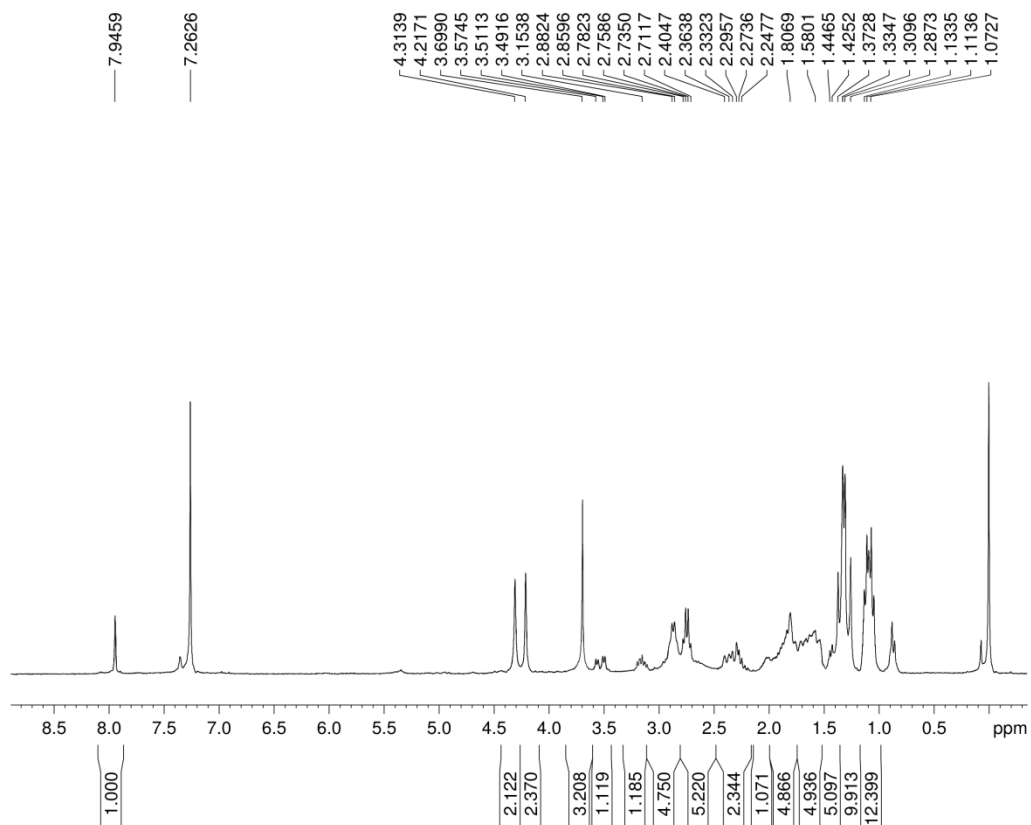

**Figure S3.**  $^1\text{H}$ -NMR spectrum of compound **4b** (300 MHz,  $\text{CDCl}_3$ )

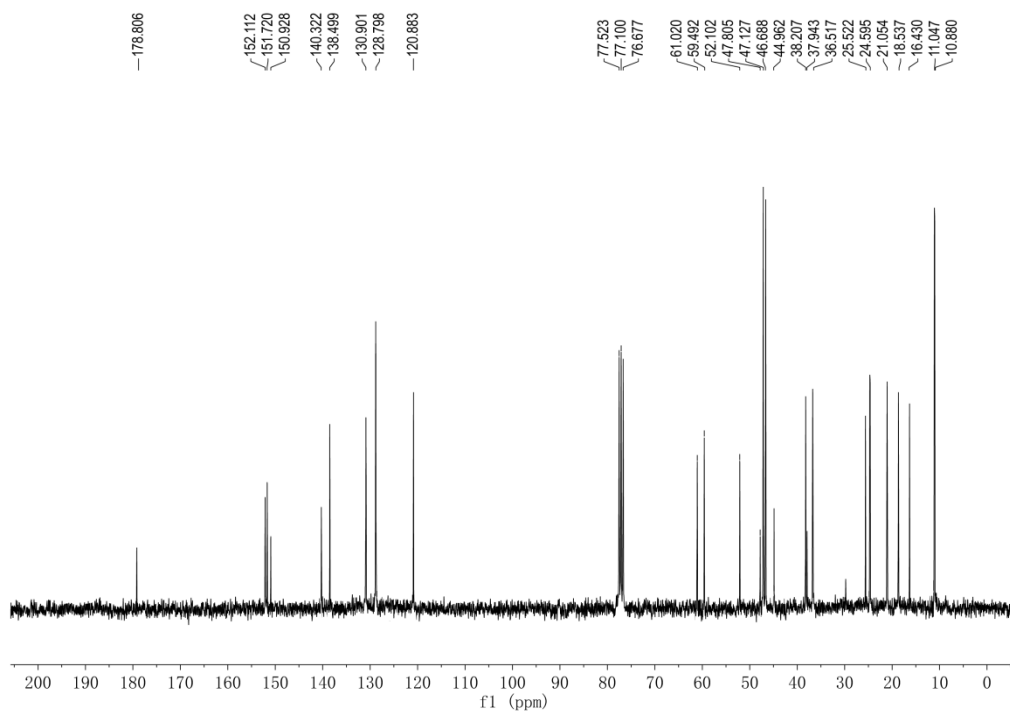

**Figure S4.**  $^{13}\text{C}$ -NMR spectrum of compound **4b** (75 MHz,  $\text{CDCl}_3$ )

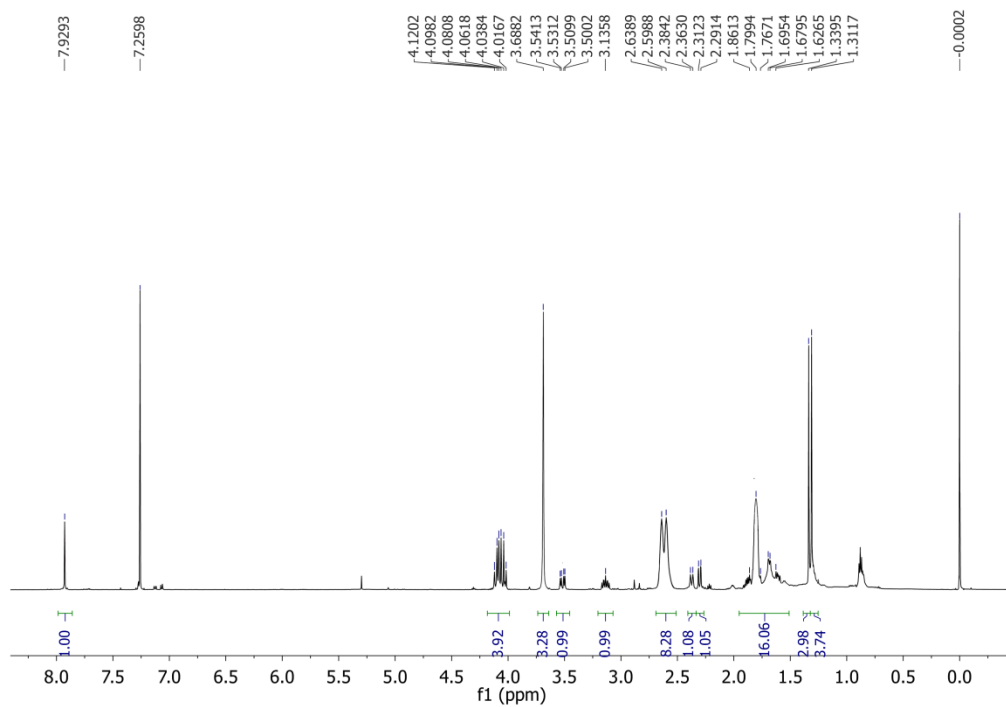

**Figure S5.**  $^1\text{H-NMR}$  spectrum of compound **4e** (600 MHz,  $\text{CDCl}_3$ )

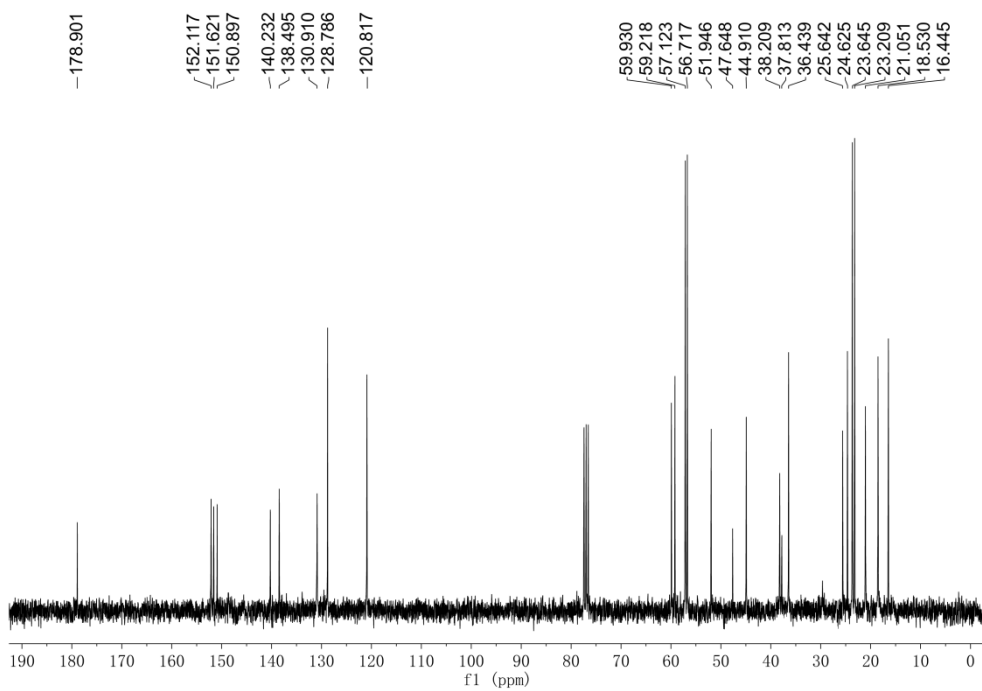

**Figure S6.**  $^{13}\text{C-NMR}$  spectrum of compound **4e** (75 MHz,  $\text{CDCl}_3$ )

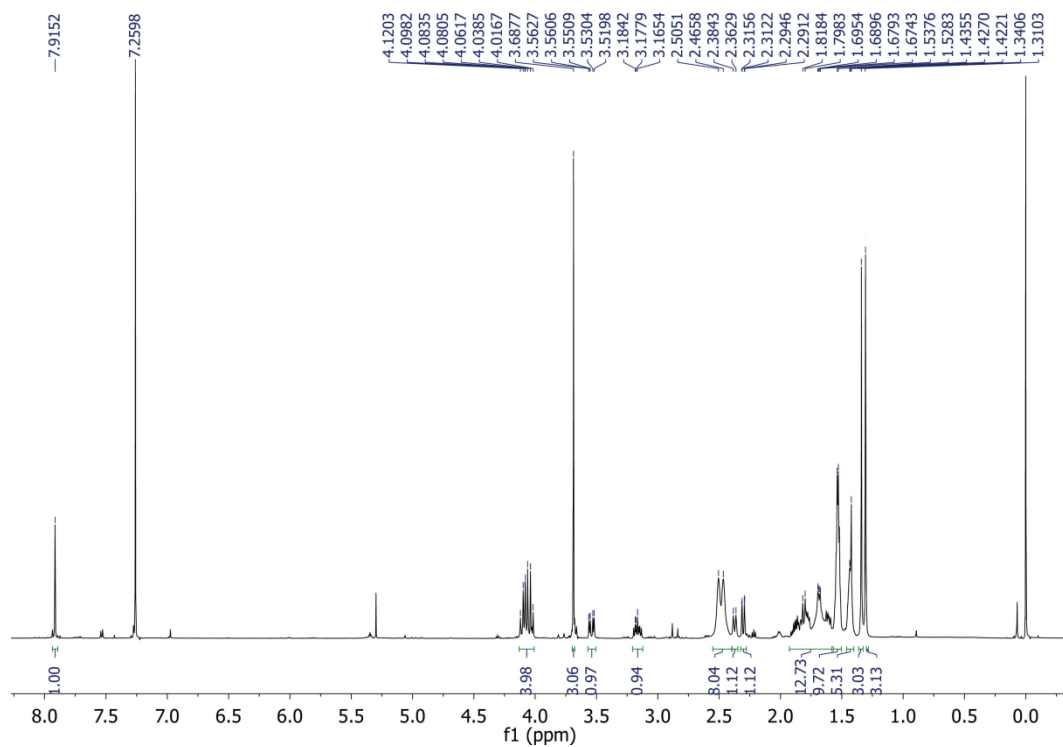

**Figure S7.**  $^1\text{H-NMR}$  spectrum of compound **4f** (600 MHz,  $\text{CDCl}_3$ )

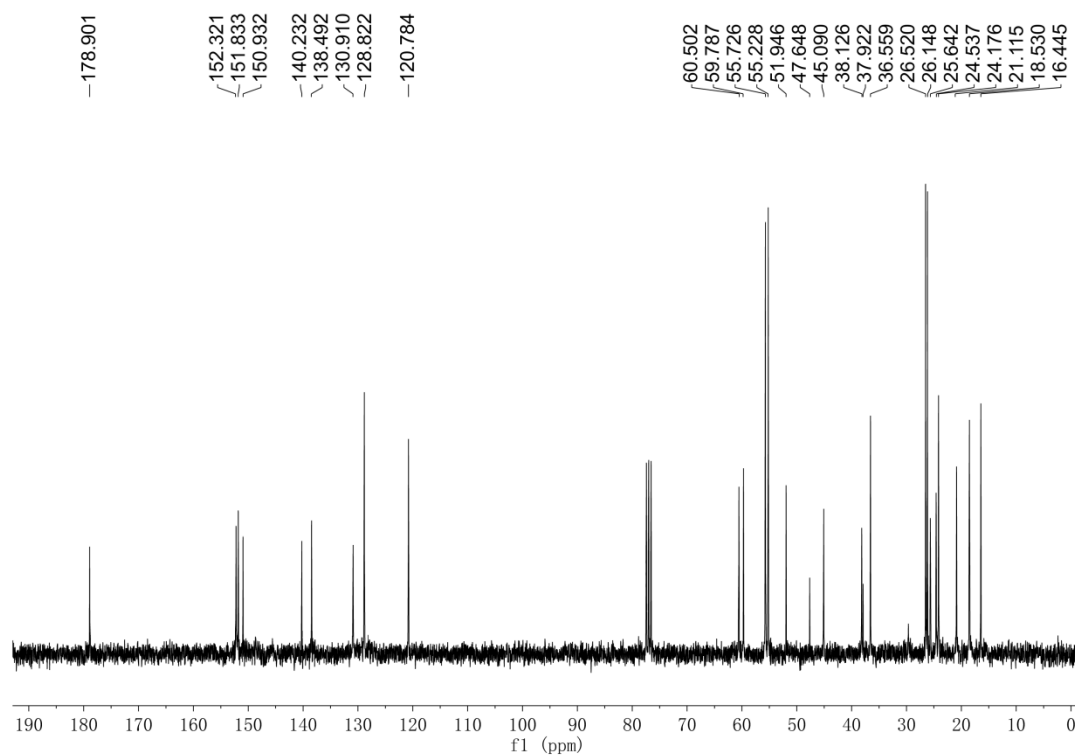

**Figure S8.**  $^{13}\text{C-NMR}$  spectrum of compound **4f** (75 MHz,  $\text{CDCl}_3$ )

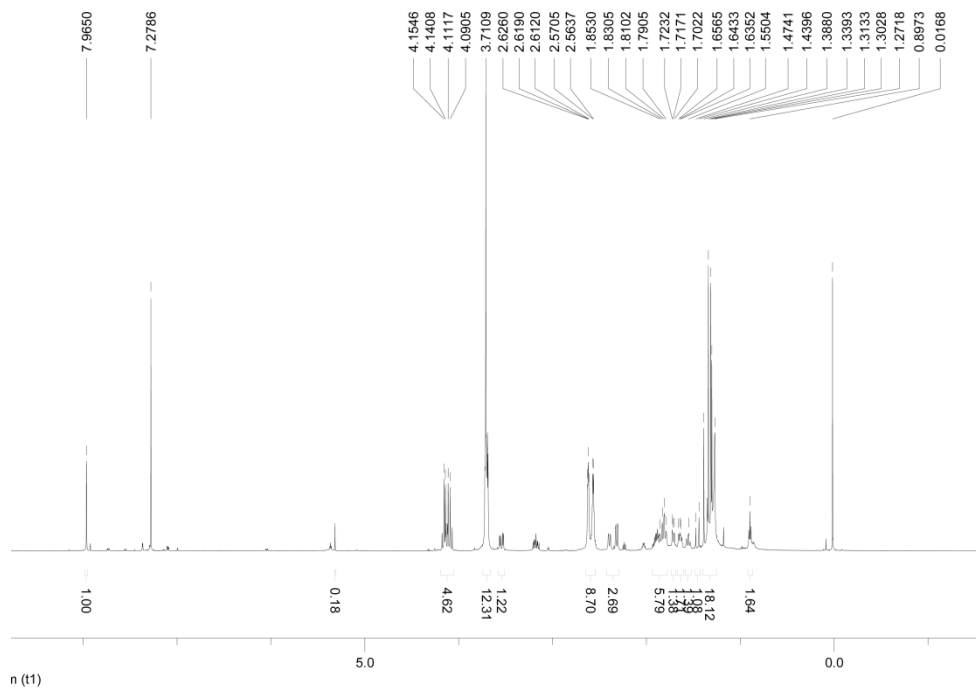

**Figure S9.**  $^1\text{H}$ -NMR spectrum of compound **4h** (600 MHz,  $\text{CDCl}_3$ )

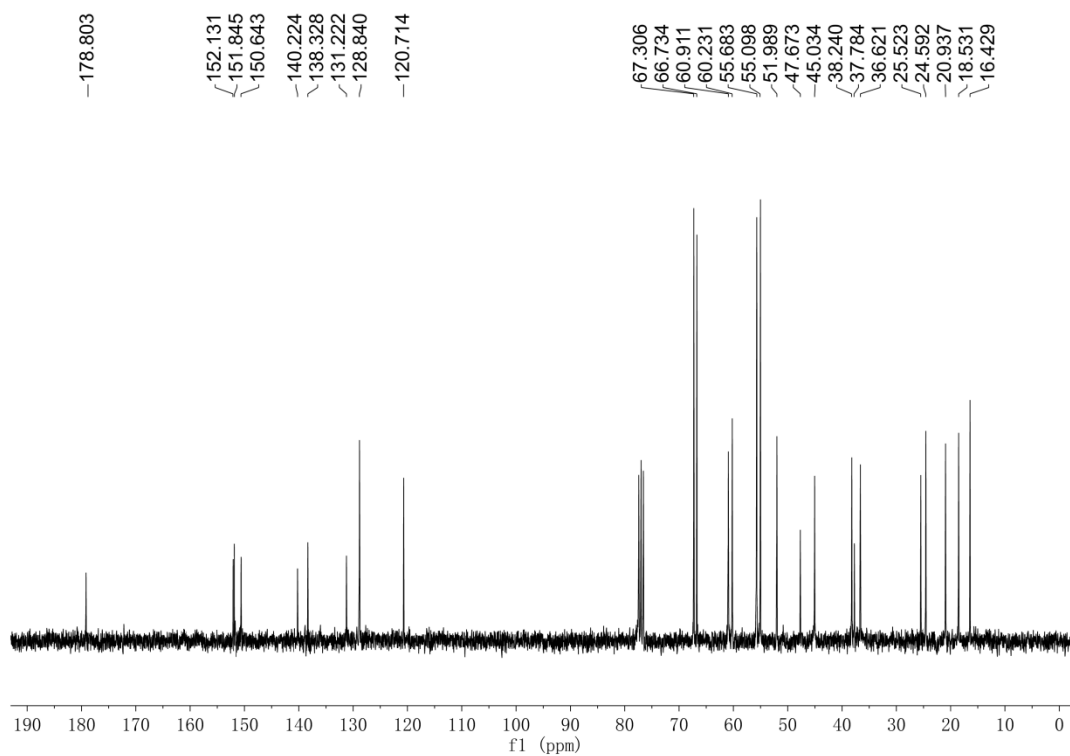

**Figure S10.**  $^{13}\text{C}$ -NMR spectrum of compound **4h** (75 MHz,  $\text{CDCl}_3$ )

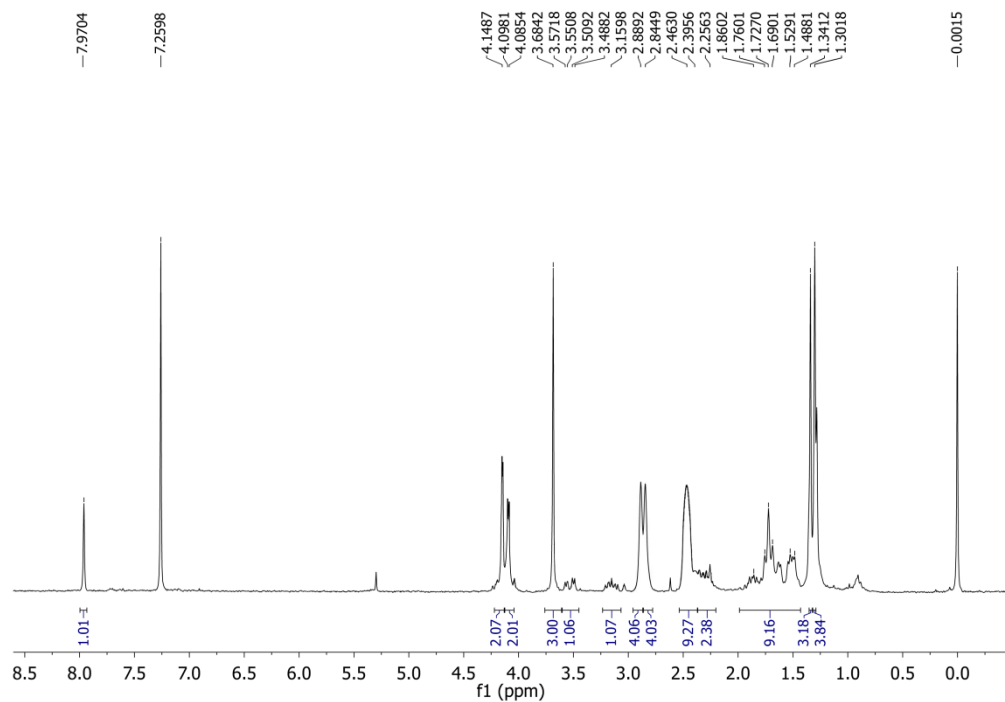

Figure S11.  $^1\text{H}$ -NMR spectrum of compound **4i** (300 MHz,  $\text{CDCl}_3$ )

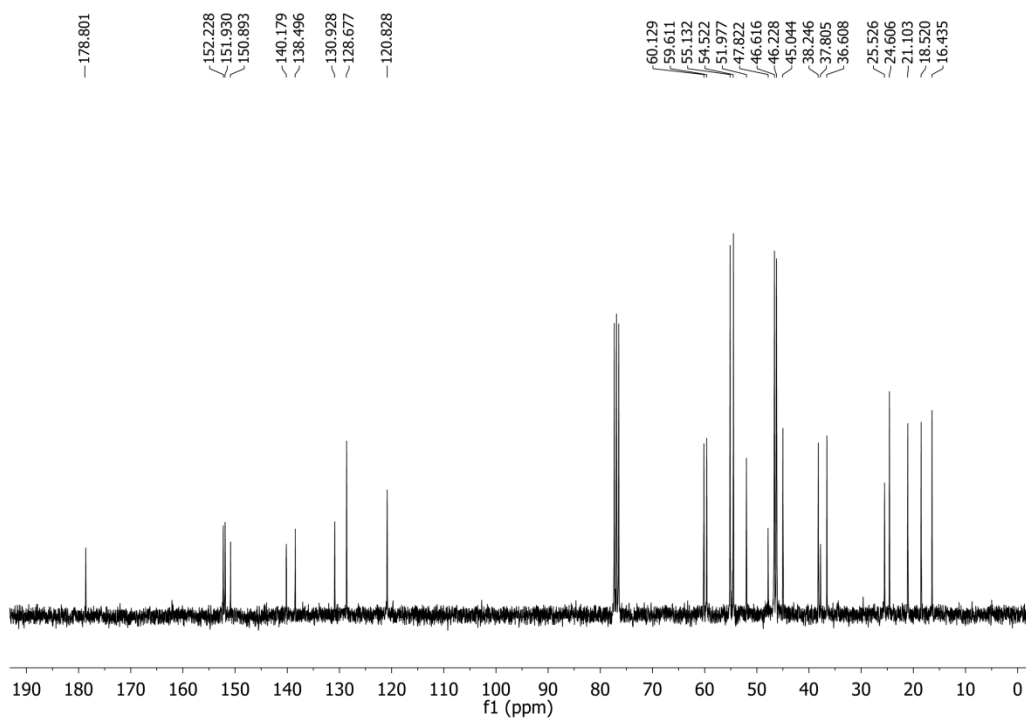

Figure S12.  $^{13}\text{C}$ -NMR spectrum of compound **4i** (75 MHz,  $\text{CDCl}_3$ )

WS-N-JiaJiPaiQin 1H-NMR CDC13 303K AV-300

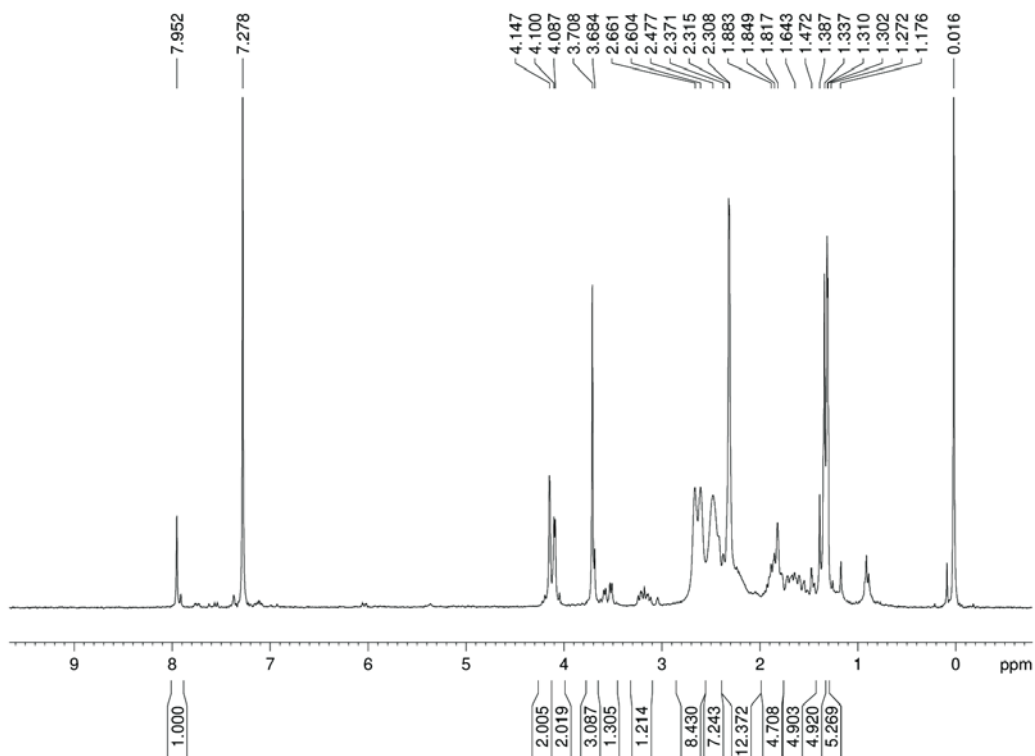

Figure S13.  $^1\text{H-NMR}$  spectrum of compound **4j** (300 MHz,  $\text{CDCl}_3$ )

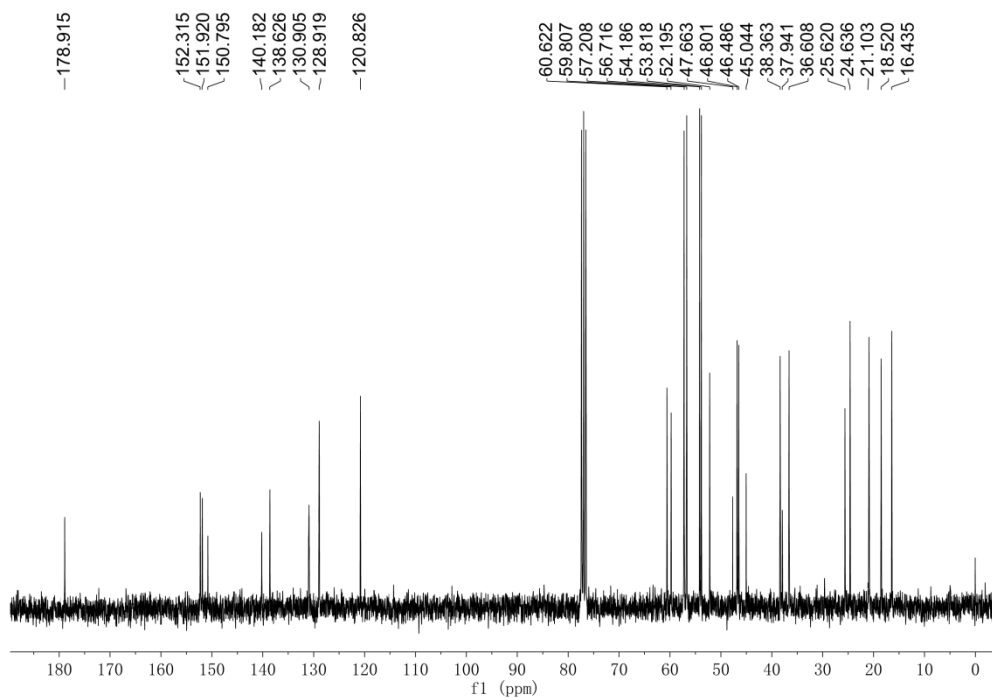

Figure S14.  $^{13}\text{C-NMR}$  spectrum of compound **4j** (75 MHz,  $\text{CDCl}_3$ )

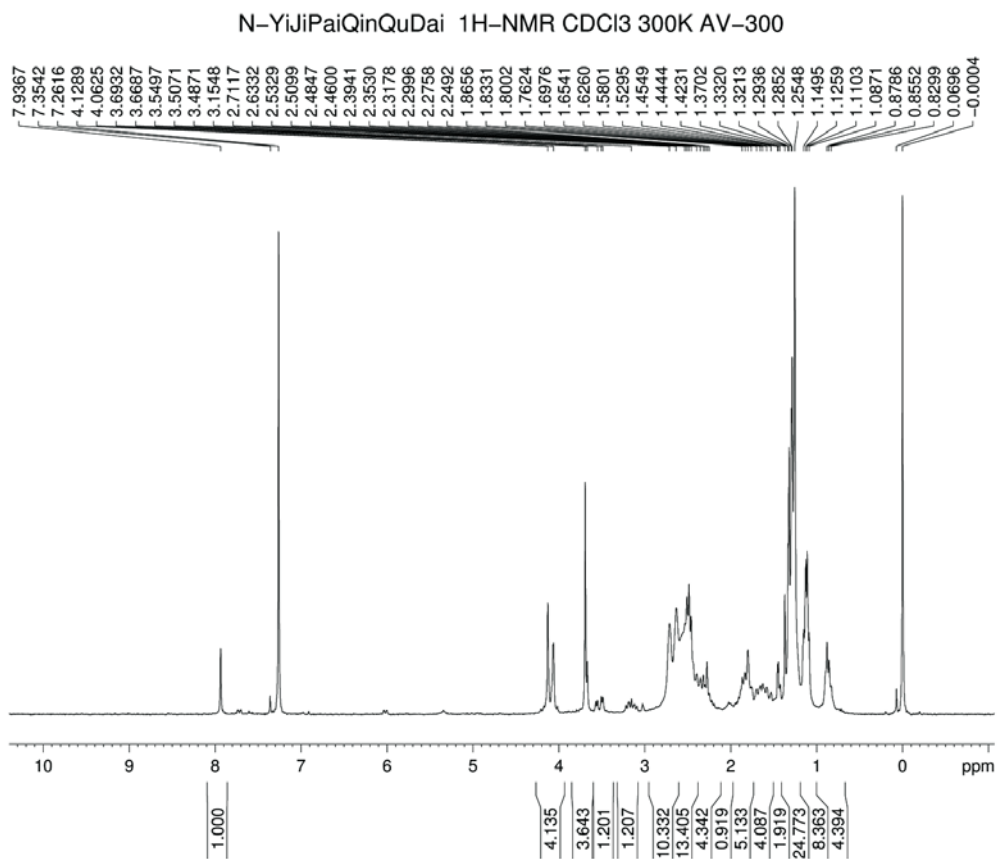

Figure S15. <sup>1</sup>H-NMR spectrum of compound **4k** (300 MHz, CDCl<sub>3</sub>)

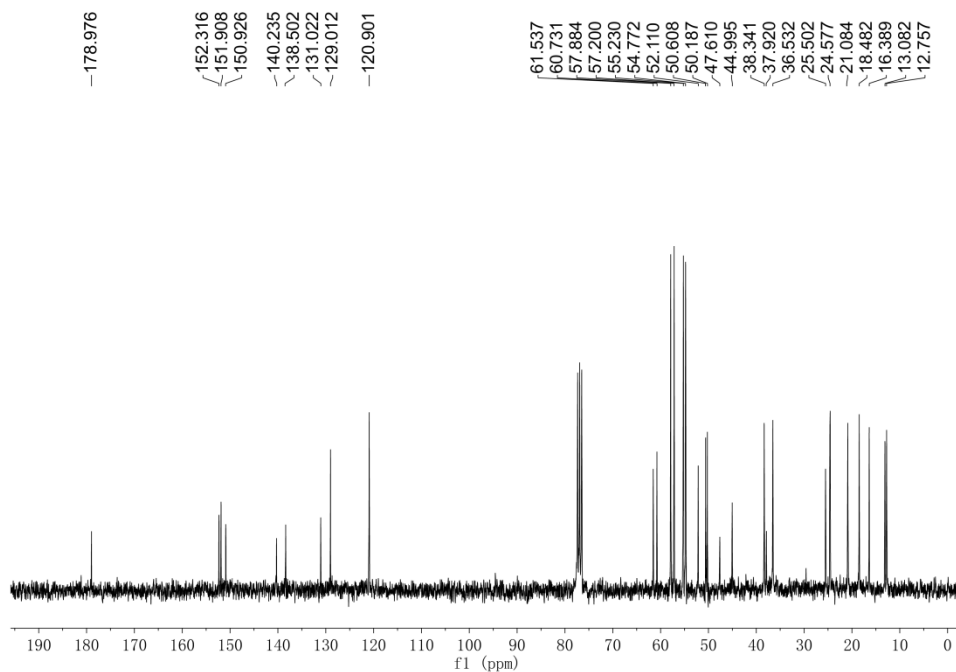

Figure S16. <sup>13</sup>C-NMR spectrum of compound **4k** (75 MHz, CDCl<sub>3</sub>)



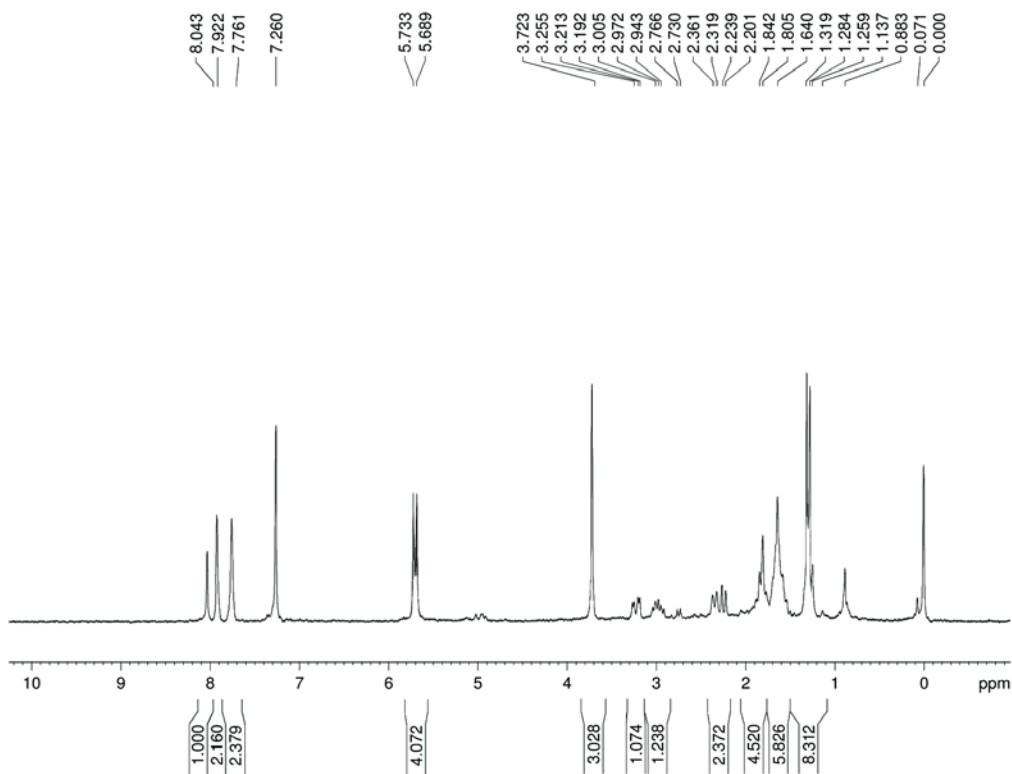

**Figure S17.**  $^1\text{H-NMR}$  spectrum of compound **4m** (300 MHz,  $\text{CDCl}_3$ )

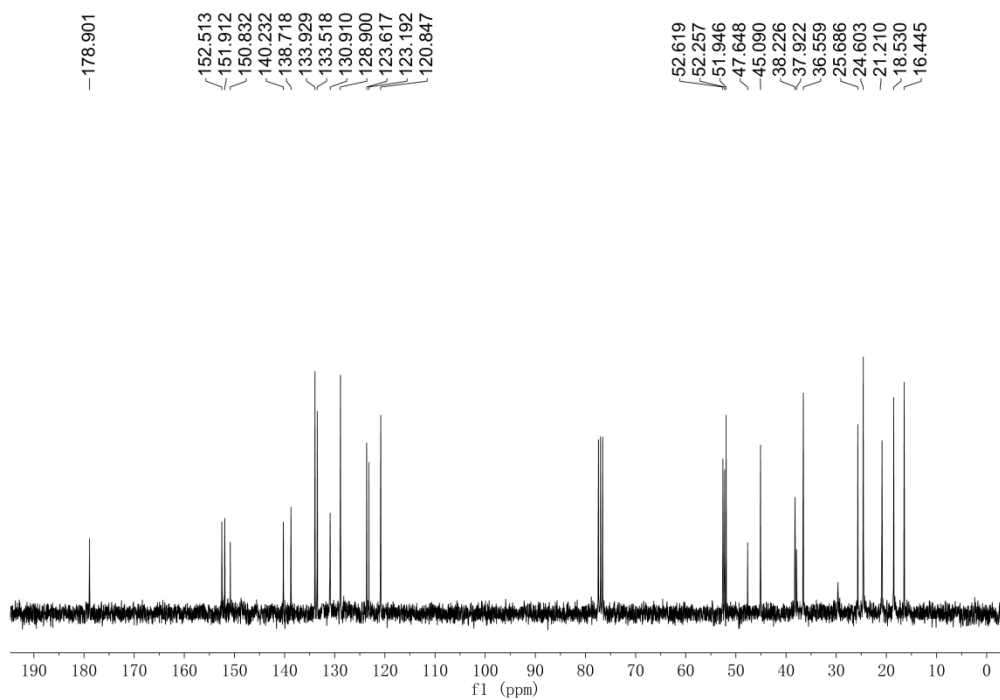

**Figure S18.**  $^{13}\text{C-NMR}$  spectrum of compound **4m** (75 MHz,  $\text{CDCl}_3$ )

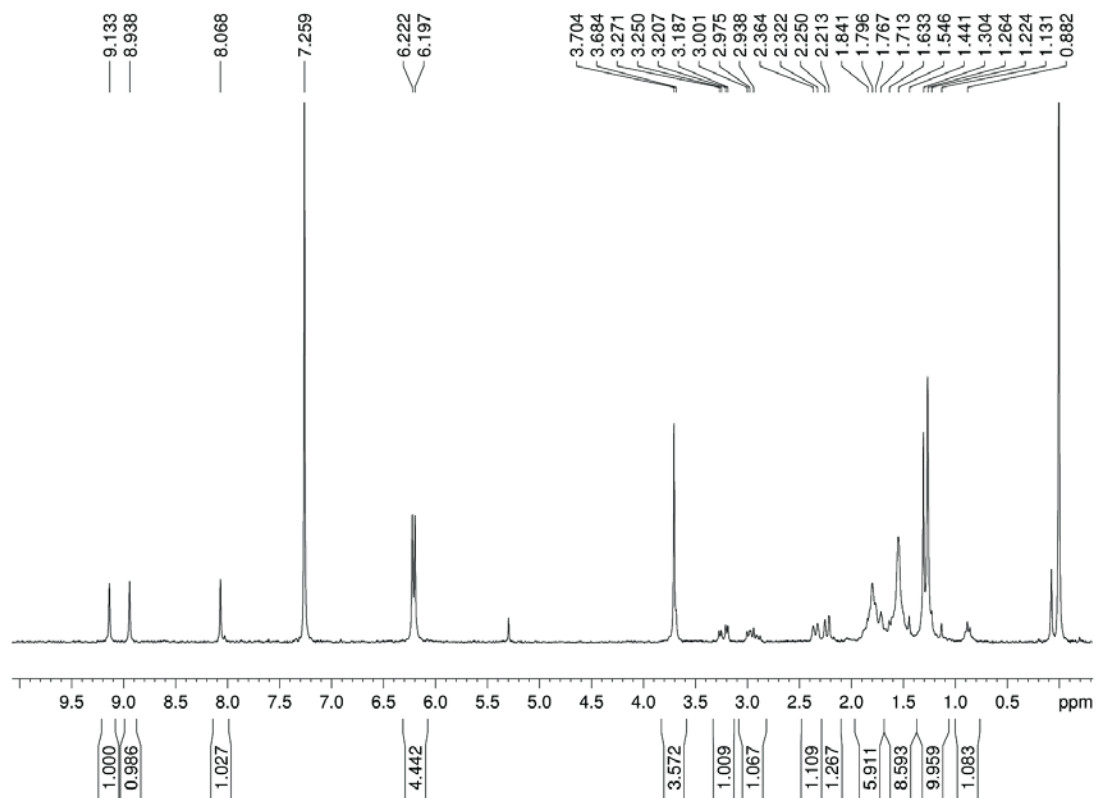

**Figure S19.**  $^1\text{H-NMR}$  spectrum of compound **4n** (300 MHz,  $\text{CDCl}_3$ )

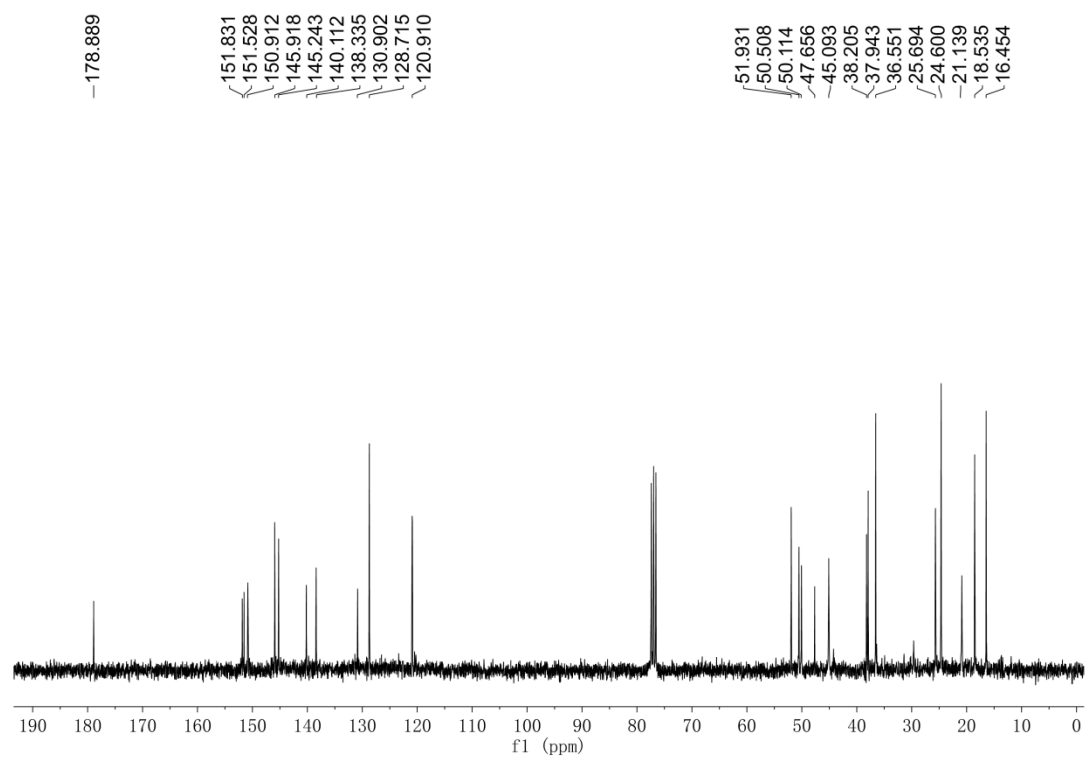

**Figure S20.**  $^{13}\text{C-NMR}$  spectrum of compound **4n** (75 MHz,  $\text{CDCl}_3$ )

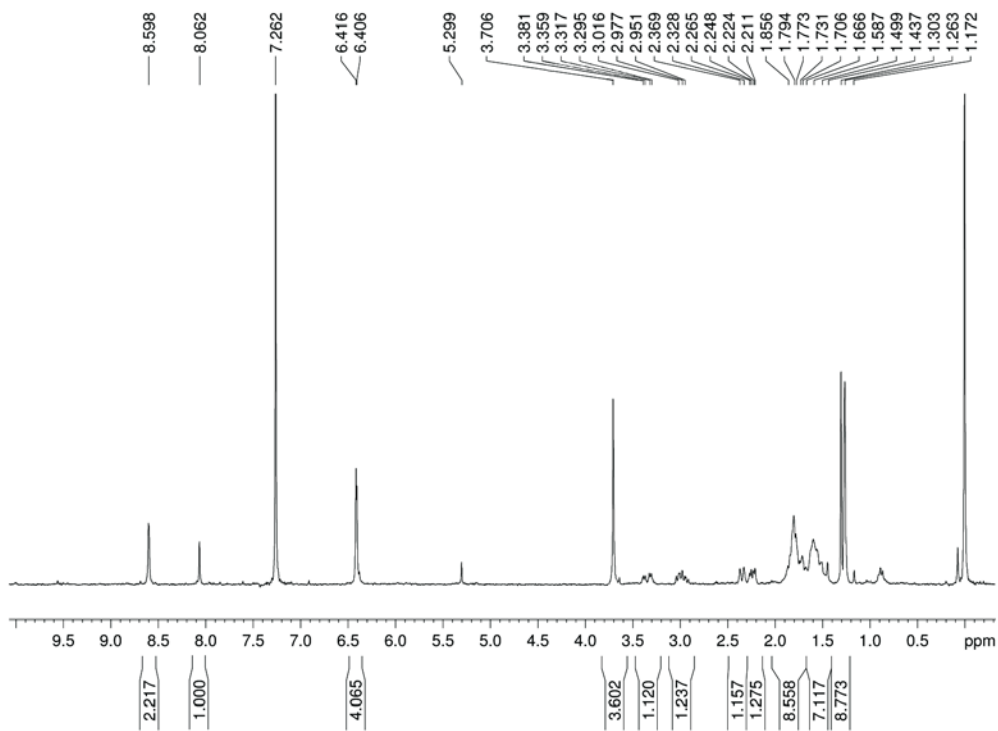

**Figure S21.**  $^1\text{H}$ -NMR spectrum of compound **4o** (300 MHz,  $\text{CDCl}_3$ )

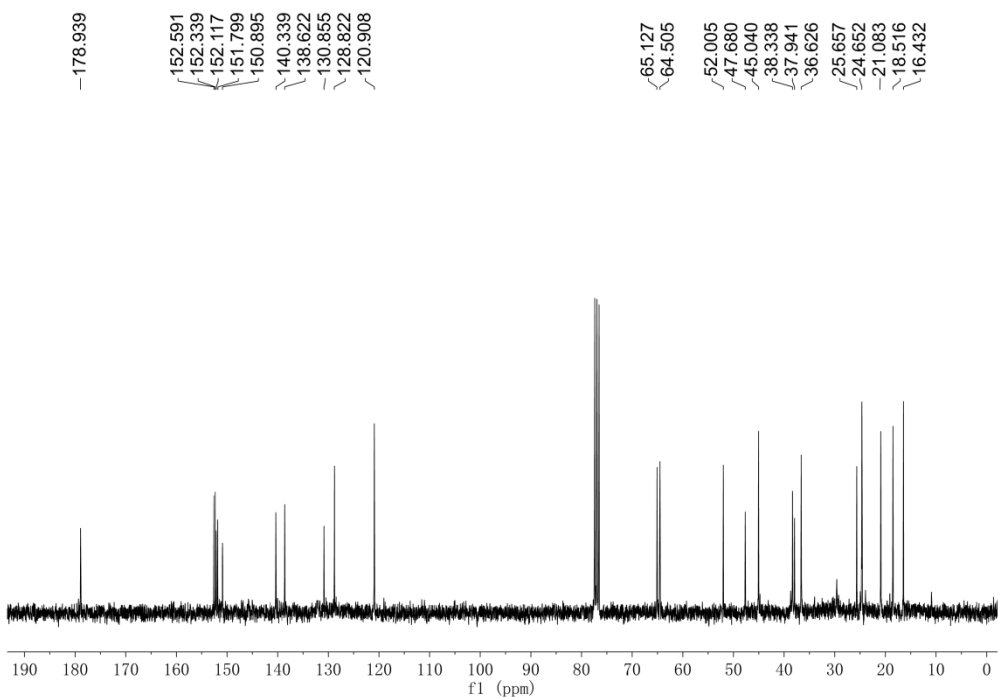

**Figure S22.**  $^{13}\text{C}$ -NMR spectrum of compound **4o** (75 MHz,  $\text{CDCl}_3$ )
